# Supplementary material
Source: PubMed Central journal article supplement (PMC2765864)

**Supplementary information**  
**Supplementary Table 1 Data collection and refinement statistics**

|                                      | <b>Vβ8.2 TCR-mCD1d-<br/>α-GalCer</b>                                                            | <b>Vβ7 TCR-mCD1d-<br/>α-GalCer</b>                                                             | <b>Vβ11 TCR-hCD1d-α-<br/>GalCer</b>                                                                            |
|--------------------------------------|-------------------------------------------------------------------------------------------------|------------------------------------------------------------------------------------------------|----------------------------------------------------------------------------------------------------------------|
| <b>Data collection</b>               |                                                                                                 |                                                                                                |                                                                                                                |
| Temperature                          | 100K                                                                                            | 100K                                                                                           | 100K                                                                                                           |
| Resolution limits (Å)                | 50-2.9 (3.06-2.90)                                                                              | 50-2.8 (2.95-2.80)                                                                             | 50-2.5 (2.59-2.50)                                                                                             |
| Space Group                          | P2 <sub>1</sub> 2 <sub>1</sub> 2 <sub>1</sub>                                                   | P2 <sub>1</sub> 2 <sub>1</sub> 2 <sub>1</sub>                                                  | P2                                                                                                             |
| Cell dimensions (Å)                  | <i>a</i> =61.113, <i>b</i> =81.506,<br><i>c</i> = 233.451,<br>$\alpha=\beta=\gamma=90.00^\circ$ | <i>a</i> =58.229, <i>b</i> =81.913,<br><i>c</i> =243.253,<br>$\alpha=\beta=\gamma=90.00^\circ$ | <i>a</i> =112.11, <i>b</i> =82.36<br><i>c</i> =117.18,<br>$\alpha=90.00, \beta=101.3,$<br>$\gamma=90.00^\circ$ |
| Total N <sup>o</sup> observations    | 149997                                                                                          | 205387                                                                                         | 195771                                                                                                         |
| N <sup>o</sup> unique observations   | 26743                                                                                           | 29526                                                                                          | 66054                                                                                                          |
| Multiplicity                         | 5.6 (6.0)                                                                                       | 7.0 (5.8)                                                                                      | 3.0 (2.7)                                                                                                      |
| Data completeness                    | 100 (100)                                                                                       | 99.7 (99.1)                                                                                    | 91.1 (74.3)                                                                                                    |
| I/ $\sigma_1$                        | 11.1 (2.1)                                                                                      | 13.7 (2.2)                                                                                     | 10.5 (1.7)                                                                                                     |
| R <sub>p.i.m</sub> <sup>1</sup> (%)  | 7.6 (31.5)                                                                                      | 5.3 (30.4)                                                                                     | -                                                                                                              |
| R <sub>merge</sub> <sup>2</sup> (%)  | -                                                                                               | -                                                                                              | 8.8 (34.3)                                                                                                     |
| <b>Refinement statistics</b>         |                                                                                                 |                                                                                                |                                                                                                                |
| R <sub>factor</sub> <sup>3</sup> (%) | 23.4                                                                                            | 22.4                                                                                           | 21.6                                                                                                           |
| R <sub>free</sub> <sup>4</sup> (%)   | 29.8                                                                                            | 27.1                                                                                           | 27.9                                                                                                           |
| Non hydrogen atoms                   |                                                                                                 |                                                                                                |                                                                                                                |
| - protein                            | 6559                                                                                            | 6528                                                                                           | 12995                                                                                                          |
| - lipid                              | 60                                                                                              | 60                                                                                             | 120                                                                                                            |
| - water                              | 28                                                                                              | 47                                                                                             | 494                                                                                                            |
| - other                              | 56                                                                                              | 56                                                                                             | 93                                                                                                             |
| Ramachandran plot                    |                                                                                                 |                                                                                                |                                                                                                                |
| - Most favoured                      | 88.9                                                                                            | 91.6                                                                                           | 89.4                                                                                                           |
| - Allowed region (%)                 | 11.1                                                                                            | 8.3                                                                                            | 10.1                                                                                                           |
| - Generously allowed region (%)      | 0.0                                                                                             | 0.1                                                                                            | 0.5                                                                                                            |
| B-factors (Å <sup>2</sup> )          |                                                                                                 |                                                                                                |                                                                                                                |
| - Average main chain                 | 48.8                                                                                            | 44.0                                                                                           | 42.8                                                                                                           |
| - Average side chain                 | 49.0                                                                                            | 44.3                                                                                           | 42.5                                                                                                           |
| - α-GalCer                           | 52.1                                                                                            | 49.0                                                                                           | 29.7                                                                                                           |
| - water                              | 38.7                                                                                            | 33.1                                                                                           | 38.9                                                                                                           |
| rmsd bonds (Å)                       | 0.007                                                                                           | 0.006                                                                                          | 0.007                                                                                                          |
| rmsd angles (°)                      | 1.076                                                                                           | 1.029                                                                                          | 1.119                                                                                                          |

$$^1 R_{p.i.m} = \sum_{hkl} [1/(N-1)]^{1/2} \sum_i |I_{hkl,i} - \langle I_{hkl} \rangle| / \sum_{hkl} \langle I_{hkl} \rangle$$

$$^2 R_{merge} = \sum_{hkl} \sum_i |I_{hkl,i} - \langle I_{hkl} \rangle| / \sum_{hkl} \langle I_{hkl} \rangle$$

$$^3 R_{factor} = (\sum | |F_o| - |F_c| | ) / (\sum |F_o|) - \text{for all data except as indicated in footnote 3.}$$

<sup>4</sup> 5% of data was used for the R<sub>free</sub> calculation

Values in parentheses refer to the highest resolution bin.

**Supplementary Table 2 SPR data for NKT TCR interactions**

| Interaction                                   | $K_{on}$ ( $M^{-1}s^{-1}$ ) | $K_{off}$ ( $s^{-1}$ ) | $t_{1/2}$ (s) | $K_D$ Calc.<br>(nm) | $\chi^2$ | $K_D$ obs.<br>(nm) |
|-----------------------------------------------|-----------------------------|------------------------|---------------|---------------------|----------|--------------------|
| V $\beta$ 8.2 NKT-<br>mCD1d- $\alpha$ -GalCer | 6.40E+05                    | 0.04                   | 17.32         | 54.9                | 16.36    | 69.7               |
| V $\beta$ 8.2 NKT-<br>hCD1d- $\alpha$ -GalCer | 1.03E+06                    | 0.09                   | 7.7           | 84.9                | 7.21     | 93.9               |
| V $\beta$ 7 NKT- mCD1d-<br>$\alpha$ -GalCer   | 4.26E+05                    | 0.1                    | 6.93          | 224                 | 2.14     | 295                |
| V $\beta$ 7 NKT-hCD1d-<br>$\alpha$ -GalCer    | 1.28E+05                    | 0.49                   | 1.41          | 3810                | 4.09     | 3420               |
| hNKT TCR-<br>mCD1d- $\alpha$ -GalCer          | 3.15E+05                    | 0.33                   | 2.1           | 1060                | 9.15     | 910                |
| hNKT TCR-hCD1d-<br>$\alpha$ -GalCer           | 6.27E+05                    | 0.15                   | 4.62          | 236                 | 9.95     | 219                |

**Supplementary Table 3 SPR data for mutant NKT TCR interactions**

| <u>Mutant</u> | <u>K<sub>D</sub> (nM)</u> |
|---------------|---------------------------|
| Vβ7 wt        | 134                       |
| Vβ7 D26A      | 171                       |
| Vβ7 S54A      | 32.6                      |
| Vβ7 S56A      | 189                       |
| Vβ7 Y50F      | 520                       |
| Vβ7 E57A      | 225                       |
|               |                           |
| Vβ8.2 wt      | 29.4                      |
| Vβ8.2 N28A    | 33.7                      |
| Vβ8.2 Y48F    | > 1690                    |
| Vβ8.2 Y50F    | 377                       |
| Vβ8.2 E56A    | 165                       |

## **Supplementary Figures**

### **Suppl. Fig. 1.** Characterisation of recombinant NKT TCRs

(A) Purified bacterially-expressed TCRs were analysed by SDS-PAGE under reducing conditions (lanes 1-4) and non-reducing conditions (lanes 5-8). Lanes 1&5 control TCR LC13, lanes 2&6 human V $\alpha$ 24V $\beta$ 11 (NKT-15), lanes 3&7 mouse V $\alpha$ 14-V $\beta$ 7 and lanes 4&8 mouse V $\alpha$ 14-V $\beta$ 8.2.

(B) The structural integrity of the constant domains of the recombinant soluble TCRs were assessed by using the conformationally-specific mAb, 12H8 in an ELISA. Plate bound TCRs, LC13 (positive control), human V $\alpha$ 24V $\beta$ 11 NKT-15 TCR, mouse V $\alpha$ 14V $\beta$ 7 TCR, mouse V $\alpha$ 14V $\beta$ 8.2 TCR or irrelevant HLA B8-FLR (negative control) were treated with graded amounts of 12H8. 12H8-reactivity is shown as absorbance at 492nm on the vertical axis and concentration of 12H8 ( $\mu$ g/ml) is indicated on the horizontal axis.

**Suppl. Fig. 2** Shift in the position of the galactose head group of  $\alpha$ -GalCer in mCD1d when ligated to the mouse NKT TCR. Mouse NKT TCR CDR1 $\alpha$ , purple; CDR3 $\alpha$ , yellow; mCD1d in ternary complex, grey;  $\alpha$ -GalCer in ternary complex, magenta; mCD1d in binary complex, pink;  $\alpha$ -GalCer in binary complex, green.

### **Suppl. Fig. 3** Sequence alignments between mouse and human NKT TCRs

**Suppl. Fig. 4** Comparison of mouse NKT TCR-mCD1d- $\alpha$ -GalCer with human NKT TCR-hCD1d- $\alpha$ -GalCer. Parallel docking mode of the human and mouse NKT-TCR onto CD1d- $\alpha$ -GalCer. **(A)** Superposition of mouse V $\alpha$ 14-V $\beta$ 8.2 NKT TCR-mCD1d- $\alpha$ -GalCer and human V $\alpha$ 24-V $\beta$ 11 NKT TCR-hCD1d- $\alpha$ -GalCer. mTCR  $\alpha$ -chain, cyan; mTCR  $\beta$ -chain, green;  $\alpha$ -GalCer in mouse complex, magenta; mCD1d heterodimer, grey; hTCR  $\alpha$ -chain, salmon; hTCR  $\beta$ -chain, yellow;  $\alpha$ -GalCer in human complex, marine; hCD1d heterodimer, palegreen; **(B)** Superposition of mouse V $\alpha$ 14-V $\beta$ 7 NKT TCR-mCD1d- $\alpha$ -GalCer and human V $\alpha$ 24-V $\beta$ 11 NKT TCR-hCD1d- $\alpha$ -GalCer. mTCR  $\beta$ -chain, blue. mTCR  $\alpha$ -chain,  $\alpha$ -GalCer in mouse and human complex, mCD1d, hTCR and hCD1d colour coding as in **A**.

# Supplementary Fig 1

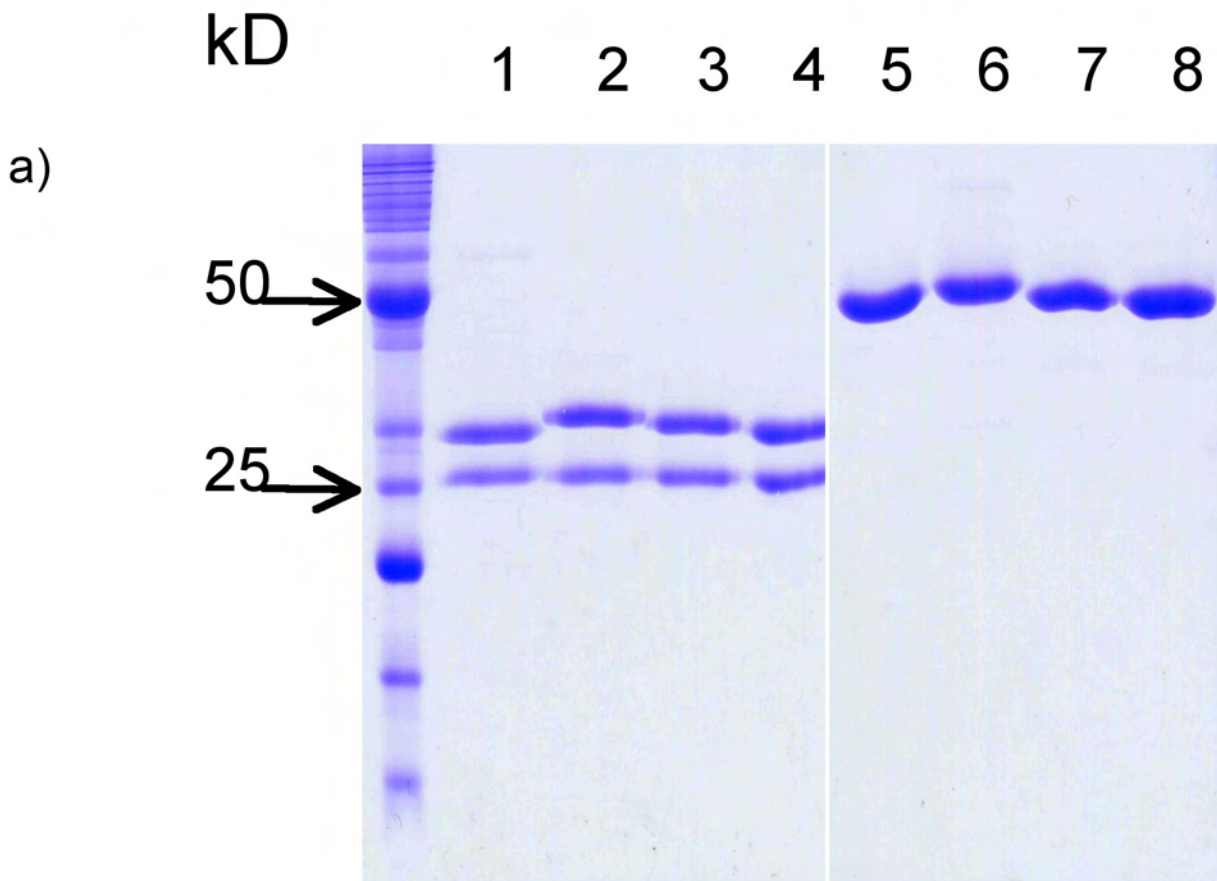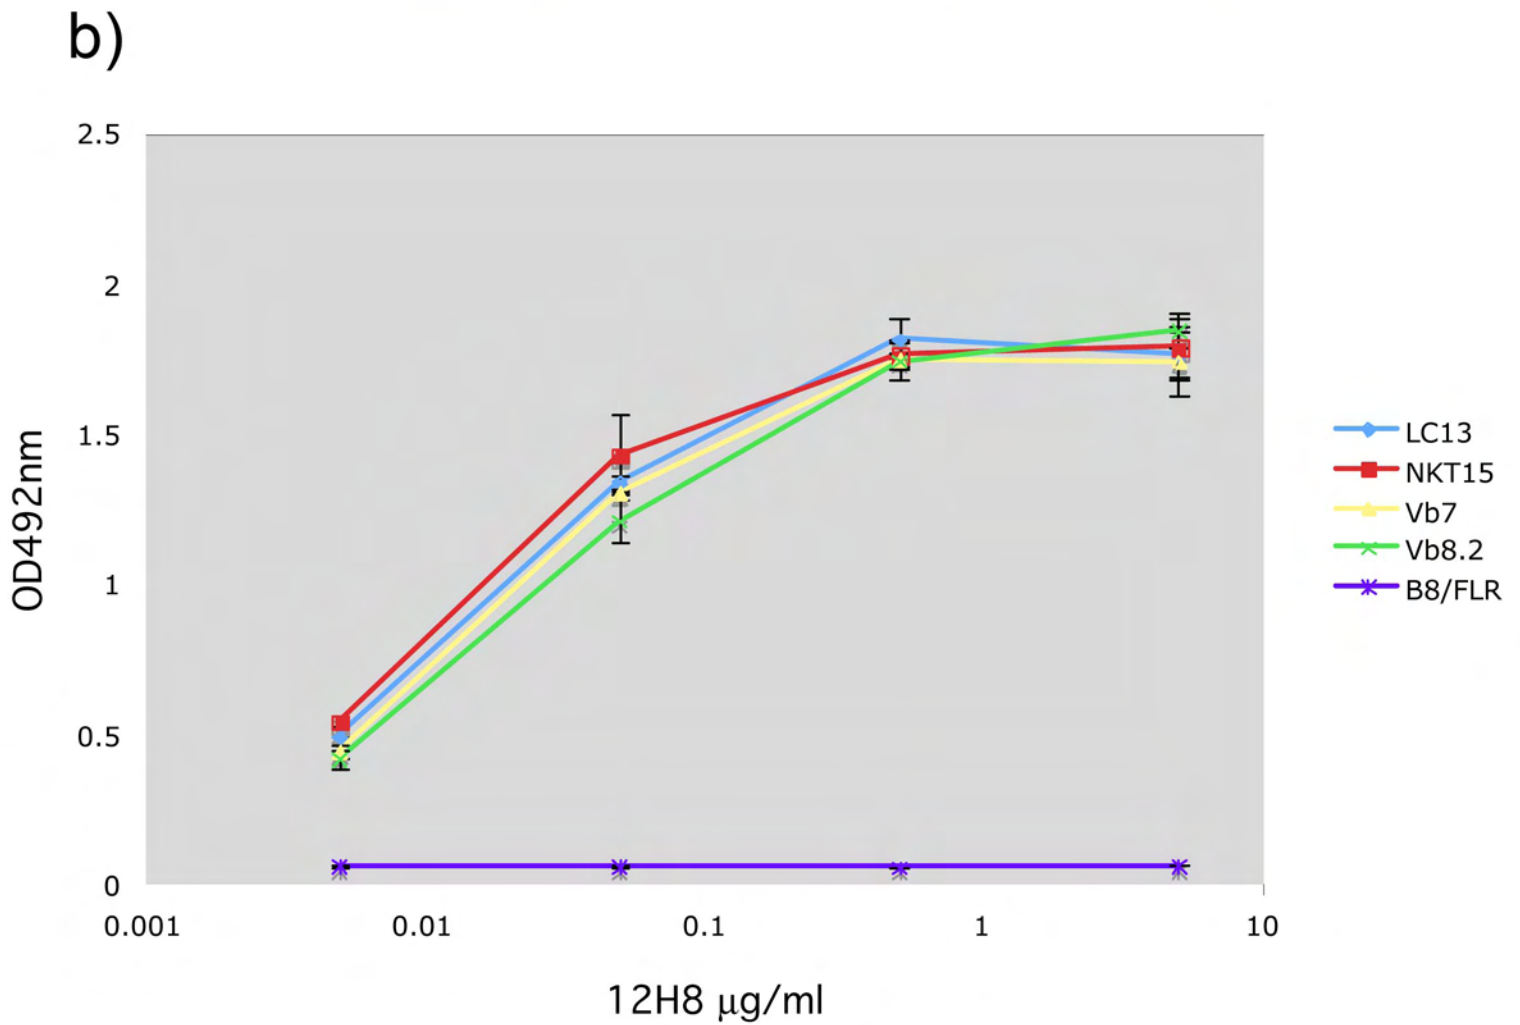

## Supplementary Figure 2

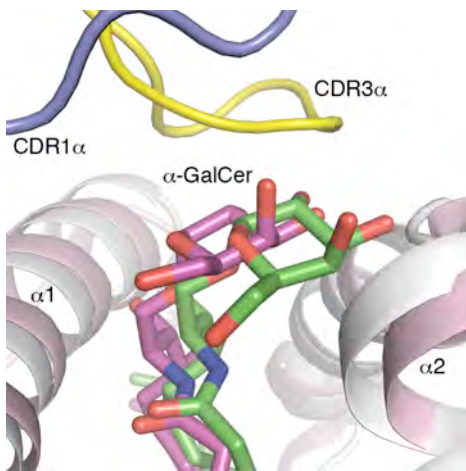

### Supplementary Figure 3

|       |       | CDR1b |    |    |    |    |    | CDR2b |    |     |     |     |     |     |     |     |     |     |     |     |     |     |     |     |     |     |
|-------|-------|-------|----|----|----|----|----|-------|----|-----|-----|-----|-----|-----|-----|-----|-----|-----|-----|-----|-----|-----|-----|-----|-----|-----|
|       |       | 26    | 27 | 28 | 29 | 30 | 31 | 48    | 49 | 50  | 51  | 52  | 53  | 54  | 55  | 56  |     |     |     |     |     |     |     |     |     |     |
| Mouse | Vb8.2 | T     | N  | N  | H  | N  | N  | Y     | S  | Y   | G   | A   | G   | S   | T   | E   |     |     |     |     |     |     |     |     |     |     |
| Mouse | Vb7   | D     | M  | S  | H  | E  | T  | I     | S  | Y   | D   | V   | D   | S   | N   | S   |     |     |     |     |     |     |     |     |     |     |
| Human | Vb11  | T     | M  | G  | H  | D  | K  | Y     | S  | Y   | G   | V   | N   | S   | T   | E   |     |     |     |     |     |     |     |     |     |     |
|       |       | CDR3b |    |    |    |    |    |       |    |     |     |     |     |     |     |     |     |     |     |     |     |     |     |     |     |     |
|       |       | 92    | 93 | 94 | 95 | 96 | 97 | 98    | 99 | 100 | 101 | 102 | 103 |     |     |     |     |     |     | 117 |     |     |     |     |     |     |
| Mouse | Vb8.2 | C     | A  | S  | G  | D  | A  | G     | G  | N   | Y   | A   | E   | Q   | F   | F   | G   | P   | G   | T   | R   | L   | T   | V   | L   |     |
| Mouse | Vb7   | C     | A  | S  | S  | S  | T  | G     | L  | D   | T   | Q   | Y   | F   | G   | P   | G   | T   | R   | L   | L   | V   | L   | V   | L   |     |
| Human | Vb11  | C     | A  | S  | S  | G  | L  | R     | D  | R   | G   | L   | Y   | E   | Q   | Y   | F   | G   | P   | G   | T   | R   | L   | T   | V   | T   |
|       |       | CDR1a |    |    |    |    |    | CDR2a |    |     |     |     |     |     |     |     |     |     |     |     |     |     |     |     |     |     |
|       |       | 26    | 27 | 28 | 29 | 30 | 31 | 49    | 50 | 51  | 52  | 53  | 54  |     |     |     |     |     |     |     |     |     |     |     |     |     |
| Mouse | Va14  | V     | T  | P  | D  | N  | H  | L     | V  | D   | Q   | K   | D   |     |     |     |     |     |     |     |     |     |     |     |     |     |
| Human | Va24  | V     | S  | P  | F  | S  | N  | M     | T  | F   | S   | E   | N   |     |     |     |     |     |     |     |     |     |     |     |     |     |
|       |       | CDR3a |    |    |    |    |    |       |    |     |     |     |     |     |     |     |     |     |     |     |     |     |     |     |     |     |
|       |       | 90    | 91 | 92 | 93 | 94 | 95 | 96    | 97 | 98  | 99  | 100 | 103 | 104 | 105 | 106 | 107 | 108 | 109 | 110 | 111 | 112 | 113 | 114 | 115 | 116 |
| Mouse | Va14  | C     | V  | V  | G  | D  | R  | G     | S  | A   | L   | G   | R   | L   | H   | F   | G   | A   | G   | T   | Q   | L   | I   | V   | I   | P   |
| Human | Va24  | C     | V  | V  | S  | D  | R  | G     | S  | T   | L   | G   | R   | L   | Y   | F   | G   | R   | G   | T   | Q   | L   | T   | V   | W   | P   |

# Supplementary Figure 4

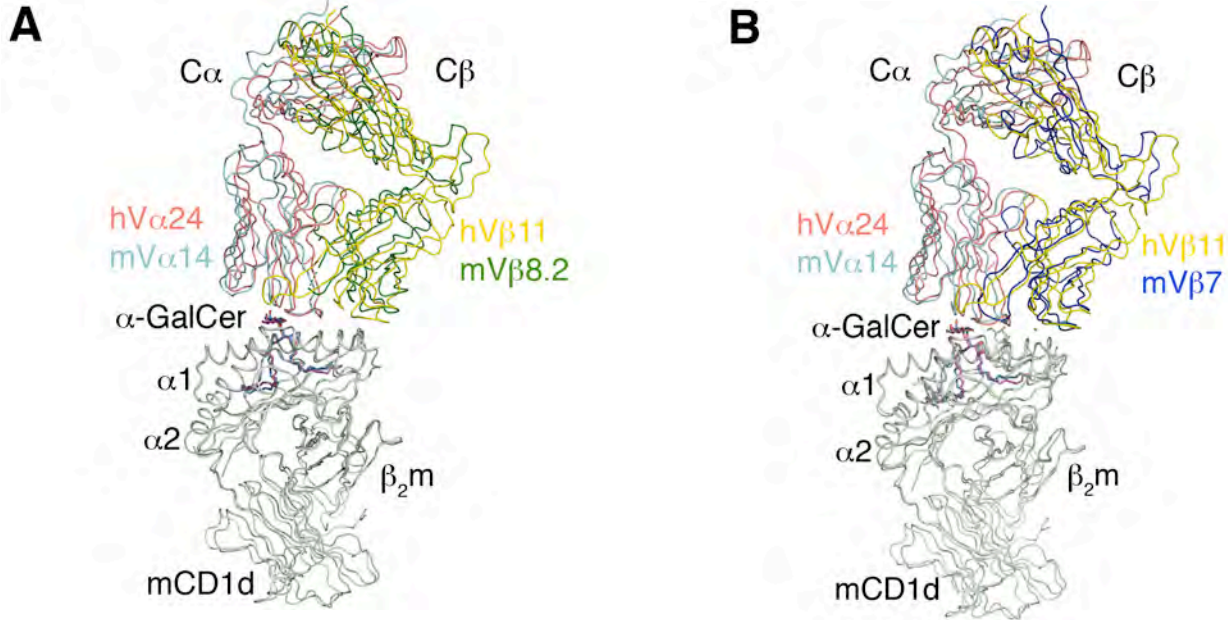

Supplement: NIHMS131521-supplement-01.pdf [file NIHMS131521-supplement-01.pdf]
